# Supplementary material for: Colour Stability, Fatty Acid Profile, and Lipid Oxidation in Meat Stored in Modified Atmosphere Packaging from Light Lambs Fed with Concentrate with Carob Pulp (Ceratonia siliqua L.)
Source: MDPI journal article supplement (doi:10.3390/antiox12081482), 2023-07-25
Supplement: s1 [file s1]

# **Colour Stability, Fatty Acid Profile, and Lipid Oxidation in Meat Stored in Modified Atmosphere Packaging from Light Lambs Fed with Concentrate with Carob Pulp (*Ceratonia siliqua* L.)**

Diego Nicolas Bottegal, Sandra Lobón; María Ángeles Latorre; Juan Ramón Bertolín; Javier Álvarez-Rodríguez.

**Table S1.** Effect of batch (winter or summer) on meat colour parameters ( $L^*$ ,  $a^*$ ,  $b^*$ ,  $C^*$ , chroma; and  $h^\circ$ , hue angle), metmyoglobin formation (%MMb), drip loss, and lipid oxidation (MDA, malondialdehyde mg/kg meat) on *Semimembranosus* muscle.

| Item                 | Batch  |        | SEM <sup>1</sup> | <i>p</i> -value <sup>2</sup> |
|----------------------|--------|--------|------------------|------------------------------|
|                      | Winter | Summer |                  |                              |
| $L^*$                | 44.8   | 46.8   | 0.40             | <0.01                        |
| $a^*$                | 10.3   | 9.52   | 0.20             | <0.01                        |
| $b^*$                | 8.40   | 8.77   | 0.18             | 0.159                        |
| $C^*$                | 13.4   | 13.0   | 0.21             | 0.141                        |
| $h^\circ$            | 38.6   | 42.4   | 0.82             | <0.01                        |
| %MMb                 | 24.6   | 22.4   | 0.44             | <0.01                        |
| Drip loss (%)        | 1.86   | 1.43   | 0.11             | <0.01                        |
| Thawed loss (%)      | 3.50   | 5.96   | 0.29             | <0.001                       |
| Moisture content (%) | 76.0   | 76.0   | 0.16             | 0.886                        |
| MDA (mg/ kg meat)    | 0.41   | 0.42   | 0.05             | 0.945                        |

<sup>1</sup>Standard error of mean. <sup>2</sup>Interaction between diet and batch was tested, and no significant effects were found.

**Table S2.** Effect of batch (winter or summer) on meat tocopherol ( $\alpha$ ,  $\gamma$  and  $\delta$ ) and cholesterol content of *Semimembranosus* muscle.

| Item                                | Batch  |        | SEM <sup>1</sup> | <i>p</i> -value |
|-------------------------------------|--------|--------|------------------|-----------------|
|                                     | Winter | Summer |                  |                 |
| $\alpha$ -tocopherol $\mu$ g/g meat | 2.85   | 2.17   | 0.16             | <0.001          |
| $\gamma$ -tocopherol ng/g meat      | 158    | 151    | 13.4             | 0.660           |
| $\delta$ -tocopherol ng/g meat      | 6.95   | 6.67   | 0.40             | 0.564           |
| Cholesterol mg/g meat               | 0.86   | 0.84   | 0.03             | 0.597           |

<sup>1</sup>Standard error of mean. <sup>2</sup>Interaction between diet and batch was tested, and no significant effects were found.

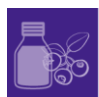

## Supplementary material

**Table S3.** Effect of batch (winter or summer) on total FAs (mg FAME/100 g meat) and the composition of saturated fatty acids (mg FA/100 g meat) of *Semimembranosus* muscle.

| Item           | Batch  |        | SEM <sup>1</sup> | <i>p</i> -value <sup>2</sup> |
|----------------|--------|--------|------------------|------------------------------|
|                | Winter | Summer |                  |                              |
| Total FA       | 2095   | 2063   | 113              | 0.842                        |
| C10:0          | 1.42   | 1.12   | 0.28             | 0.461                        |
| C11:0          | 0.17   | 0.19   | 0.03             | 0.665                        |
| C12:0          | 5.13   | 4.05   | 0.43             | 0.083                        |
| C13:0          | 10.5   | 10.3   | 0.45             | 0.792                        |
| C14:0          | 71.1   | 54.5   | 5.04             | 0.026                        |
| C15:0          | 17.1   | 15.8   | 0.63             | 0.156                        |
| C16:0          | 517    | 494    | 30.0             | 0.577                        |
| C17:0          | 32.8   | 33.7   | 2.12             | 0.761                        |
| C18:0          | 288    | 303    | 16.0             | 0.507                        |
| C19:0          | 0.86   | 0.91   | 0.12             | 0.758                        |
| C20:0          | 1.83   | 1.66   | 0.09             | 0.207                        |
| C21:0          | 0.84   | 0.81   | 0.10             | 0.811                        |
| C22:0          | 0.60   | 0.69   | 0.10             | 0.542                        |
| C24:0          | 0.10   | 0.06   | 0.02             | 0.138                        |
| Σiso-OBCFA     | 27.3   | 26.4   | 0.91             | 0.472                        |
| Σanteiso-OBCFA | 13.1   | 11.7   | 0.62             | 0.116                        |
| ΣOBCFA         | 40.4   | 38.1   | 1.50             | 0.262                        |
| ΣDMA           | 71.2   | 73.6   | 6.00             | 0.979                        |
| ΣSFA Me        | 12.4   | 12.1   | 0.75             | 0.672                        |
| ΣSFA           | 947    | 921    | 52.0             | 0.718                        |

<sup>1</sup>Standard error of mean. <sup>2</sup>Interaction between diet and batch was tested, and no significant effects were found. ΣOBCFA= sum of anteiso (*a*)- and iso (*i*)-fatty acids. ΣDMA=sum of dimethylacetals (DMA-C16:0 + DMA-C18:0 + DMA-C18:1). ΣSFA Me= ΣC14:0Me (C14:0-6Me + C14:0-8Me + C14:0-4Me + C14:0-10Me + C14:0-2.6DiMe) + ΣC15:0Me (C15:0-8Me + C15:0-4Me) + ΣC16:0Me (C16:0-2Me + C16:0-6Me + C16:0-8Me + C16:0-4Me + C16:0-12Me) + ΣC17:0Me (C17:0-12Me + C17:0-cyclo).

**Table S4.** Effect of batch (winter and summer) on the composition of mono- and poly- unsaturated fatty acids (mg FA/100 g meat) of *Semimembranosus* muscle.

| Item                | Batch  |        | SEM <sup>1</sup> | <i>p</i> -value <sup>2</sup> |
|---------------------|--------|--------|------------------|------------------------------|
|                     | Winter | Summer |                  |                              |
| C12:1               | 0.29   | 0.23   | 0.03             | 0.142                        |
| C14:1               | 2.48   | 1.55   | 0.15             | <0.001                       |
| C15:1               | 2.07   | 2.04   | 0.14             | 0.888                        |
| C16:1               | 43.3   | 35.7   | 2.90             | 0.069                        |
| <i>cis</i> -C16:1   | 39.7   | 31.8   | 2.70             | 0.047                        |
| <i>trans</i> -C16:1 | 3.62   | 3.87   | 0.26             | 0.501                        |
| C17:1               | 28.7   | 31.7   | 2.00             | 0.314                        |
| <i>cis</i> -C17:1   | 27.2   | 30.3   | 2.00             | 0.283                        |



## Supplementary material

|                                     |      |      |       |        |
|-------------------------------------|------|------|-------|--------|
| <i>trans</i> -C17:1                 | 1.50 | 1.34 | 0.01  | 0.243  |
| C18:1                               | 742  | 752  | 49.0  | 0.871  |
| <i>cis</i> 9-C18:1                  | 607  | 614  | 40.2  | 0.899  |
| <i>cis</i> 11-C18:1                 | 50.8 | 54.0 | 4.38  | 0.615  |
| <i>trans</i> 10-C18:1               | 28.9 | 28.7 | 2.90  | 0.964  |
| <i>trans</i> 11-C18:1               | 24.4 | 25.3 | 2.40  | 0.795  |
| <i>trans</i> 10/11-C18:1            | 29.2 | 27.9 | 1.82  | 0.626  |
| C20:1                               | 1.53 | 1.62 | 0.09  | 0.495  |
| C22:1                               | 0.47 | 0.57 | 0.04  | 0.070  |
| C24:1                               | 0.11 | 0.10 | 0.02  | 0.772  |
| $\Sigma$ <i>cis</i> -MUFA           | 756  | 762  | 50.2  | 0.938  |
| $\Sigma$ <i>trans</i> -MUFA         | 63.8 | 63.9 | 5.5   | 0.990  |
| $\Sigma$ MUFA                       | 820  | 826  | 53.1  | 0.940  |
| C18:2                               | 184  | 182  | 9     | 0.837  |
| C18:2n-6                            | 177  | 175  | 8.69  | 0.836  |
| C19:2n-6                            | 0.81 | 0.75 | 0.06  | 0.475  |
| C18:3n-6                            | 1.45 | 1.53 | 0.08  | 0.495  |
| C18:3n-3                            | 9.13 | 7.51 | 0.48  | 0.022  |
| C20:2n-6                            | 1.42 | 1.35 | 0.07  | 0.467  |
| C20:3n-9                            | 12.6 | 13.8 | 0.78  | 0.320  |
| C20:3n-6                            | 5.75 | 5.46 | 0.2   | 0.322  |
| C20:3n-3                            | 0.07 | 0.09 | 0.01  | 0.166  |
| C20:4n-6 ARA                        | 71.9 | 70.0 | 3.2   | 0.681  |
| C20:5n-3 EPA                        | 7.94 | 5.64 | 0.58  | 0.009  |
| C22:4n-6                            | 4.51 | 5.46 | 0.21  | <0.01  |
| C22:5n-6                            | 1.00 | 1.31 | 0.11  | 0.058  |
| C22:5n-3 DPA                        | 12.6 | 10.5 | 0.45  | <0.01  |
| C22:6n-3 DHA                        | 5.80 | 3.87 | 0.39  | <0.001 |
| $\Sigma$ CLA                        | 7.91 | 7.32 | 0.41  | 0.314  |
| <i>cis</i> 9. <i>trans</i> 11-C18:2 | 3.87 | 3.10 | 0.29  | 0.072  |
| $\Sigma$ n-6                        | 264  | 261  | 11.68 | 0.833  |
| $\Sigma$ n-3                        | 35.6 | 27.6 | 1.72  | <0.01  |
| $\Sigma$ PUFA                       | 327  | 316  | 13.7  | 0.570  |
| n-6/n-3                             | 7.59 | 9.72 | 0.39  | <0.001 |
| PUFA/SFA                            | 0.36 | 0.35 | 0.01  | 0.819  |

<sup>1</sup>Standard error of mean. <sup>2</sup> Interaction between diet and batch was tested, and no significant effects were found.  $\Sigma$  *cis*-MUFA = C12:1 + C14:1 + *cis*8-C15:1 + *cis*9-C15:1 + *cis*7-C16:1 + *cis*9-C16:1 + *cis*11-C16:1 + *cis*15-C16:1 + *cis*5-C17:1 + *cis*7-C17:1 + *cis*9-C17:1 + DMAC18:1 + *cis*11-C17:1 + *cis*6/*cis*8-C18:1 + *cis*9-C18:1 + *cis*11-C18:1 + *cis*12-C18:1 + *cis*13-C18:1 + *cis*14-C18:1 + *cis*15-C18:1 + C20:1 + C22:1 + C24:1.  $\Sigma$  *trans*-MUFA = *trans*5-C18:1 + *trans*6/*trans*8-C18:1 + *trans*9-C18:1 + *trans*10-C18:1 + *trans*11-C18:1 + *trans*12-C18:1.  $\Sigma$ CLA = Sum of conjugated linoleic acids

### Supplementary material

**Table S5.** Effects of dietary carob pulp inclusion (0, 15, and 30%) in the lambs' diet and display time (0, 7, 9, and 11 days) in Modified Atmosphere Packaging on the drip loss and thawed losses of lamb meat.

| Item                 | Diet |      |      | SEM <sup>1</sup> | Display time (day) |                   |                    |                   | SEM  | <i>p</i> -value |       |          |
|----------------------|------|------|------|------------------|--------------------|-------------------|--------------------|-------------------|------|-----------------|-------|----------|
|                      | C0%  | C15% | C30% |                  | 0                  | 7                 | 9                  | 11                |      | Diet            | Day   | Diet*Day |
| Drip loss (%)        | 1.70 | 1.40 | 1.80 | 0.10             | 1.40               | 1.80              | 1.80               | 1.60              | 0.20 | 0.100           | 0.183 | 0.798    |
| Thawed loss (%)      | 4.88 | 4.65 | 4.68 | 0.25             | 4.93 <sup>a</sup>  | 5.26 <sup>a</sup> | 4.68 <sup>ab</sup> | 4.08 <sup>b</sup> | 0.29 | 0.363           | 0.004 | 0.084    |
| Moisture content (%) | 76.3 | 76.0 | 76.1 | 0.21             | 76.3               | 76.1              | 76.1               | 76.2              | 0.16 | 0.693           | 0.550 | 0.086    |

<sup>1</sup>Standard error of the mean. <sup>a,b</sup> Least square means in the same row with different superscript letters are different ( $p < 0.05$ )

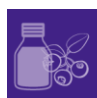

**Table S6.** Effects of carob pulp levels (0, 15, and 30%) in lambs' diet on the fatty acid composition (g FA/100 g of FAMES) of *Semi-membranosus* muscle from light lambs.

| Variable            | C0%               | C15%               | C30%              | SEM <sup>†</sup> | <i>p</i> -value |
|---------------------|-------------------|--------------------|-------------------|------------------|-----------------|
| C10:0               | 0.06              | 0.08               | 0.05              | 0.02             | 0.606           |
| C11:0               | 0.01              | 0.01               | 0.01              | 0.002            | 0.867           |
| C12:0               | 0.24              | 0.22               | 0.2               | 0.02             | 0.472           |
| C13:0               | 0.66 <sup>a</sup> | 0.54 <sup>ab</sup> | 0.44 <sup>b</sup> | 0.06             | 0.028           |
| C14:0               | 3.18              | 3.1                | 2.74              | 0.19             | 0.183           |
| C15:0               | 1.00 <sup>a</sup> | 0.85 <sup>ab</sup> | 0.67 <sup>b</sup> | 0.06             | 0.003           |
| C16:0               | 23.8              | 24.4               | 24.3              | 0.27             | 0.199           |
| C17:0               | 1.80 <sup>a</sup> | 1.58 <sup>b</sup>  | 1.44 <sup>b</sup> | 0.05             | <0.0001         |
| C18:0               | 14.0              | 14.2               | 14.4              | 0.29             | 0.597           |
| C19:0               | 0.04              | 0.04               | 0.04              | 0.01             | 0.577           |
| C20:0               | 0.10 <sup>a</sup> | 0.09 <sup>ab</sup> | 0.07 <sup>b</sup> | 0.01             | 0.012           |
| C21:0               | 0.04              | 0.05               | 0.04              | 0.01             | 0.494           |
| C22:0               | 0.02              | 0.03               | 0.04              | 0.005            | 0.156           |
| C24:0               | 0.004             | 0.005              | 0.004             | 0.001            | 0.869           |
| ΣBCFA               | 2.38 <sup>a</sup> | 2.04 <sup>ab</sup> | 1.6 <sup>b</sup>  | 0.150            | 0.004           |
| ΣDMA                | 3.35              | 3.4                | 3.99              | 0.26             | 0.177           |
| ΣSFA Me             | 0.64 <sup>a</sup> | 0.62 <sup>ab</sup> | 0.56 <sup>b</sup> | 0.02             | 0.008           |
| ΣSFA                | 45.0              | 45.2               | 44.5              | 0.57             | 0.656           |
| C12:1               | 0.02              | 0.01               | 0.01              | 0.002            | 0.150           |
| C14:1               | 0.12 <sup>a</sup> | 0.10 <sup>ab</sup> | 0.08 <sup>b</sup> | 0.01             | 0.011           |
| C15:1               | 0.11              | 0.1                | 0.1               | 0.01             | 0.639           |
| C16:1               | 1.94              | 1.82               | 1.86              | 0.07             | 0.473           |
| <i>trans</i> -C16:1 | 0.21              | 0.18               | 0.17              | 0.01             | 0.087           |
| <i>cis</i> -C16:1   | 1.73              | 1.65               | 1.7               | 0.07             | 0.644           |

|                              |                   |                    |                   |       |       |
|------------------------------|-------------------|--------------------|-------------------|-------|-------|
| C17:1                        | 1.49              | 1.34               | 1.51              | 0.07  | 0.153 |
| <i>trans</i> -C17:1          | 0.08 <sup>a</sup> | 0.07 <sup>a</sup>  | 0.06 <sup>b</sup> | 0.01  | 0.001 |
| <i>cis</i> -C17:1            | 1.4               | 1.27               | 1.45              | 0.07  | 0.146 |
| C18:1                        | 35.1              | 35.3               | 36.3              | 0.84  | 0.503 |
| <i>cis</i> 9-C18:1           | 28.9              | 28.7               | 29.7              | 0.78  | 0.320 |
| <i>trans</i> 10-18:1         | 1.43              | 1.61               | 1.2               | 0.150 | 0.195 |
| <i>trans</i> 11-18:1         | 1.15              | 1.23               | 1.18              | 0.100 | 0.871 |
| <i>cis</i> 11-C18:1          | 2.27 <sup>b</sup> | 2.36 <sup>ab</sup> | 2.74 <sup>a</sup> | 0.140 | 0.044 |
| C20:1                        | 0.10 <sup>a</sup> | 0.08 <sup>ab</sup> | 0.07 <sup>b</sup> | 0.01  | 0.028 |
| C22:1                        | 0.03              | 0.02               | 0.02              | 0.003 | 0.129 |
| C24:1                        | 0.01              | 0.005              | 0.005             | 0.001 | 0.461 |
| $\Sigma$ <i>trans</i> -C18:1 | 2.98              | 3.26               | 2.75              | 0.28  | 0.389 |
| $\Sigma$ <i>cis</i> -C18:1   | 32.0              | 32.0               | 33.5              | 0.84  | 0.320 |
| $\Sigma$ <i>cis</i> MUFA     | 35.8              | 35.5               | 37.2              | 0.83  | 0.320 |
| $\Sigma$ <i>trans</i> MUFA   | 3.1               | 3.36               | 2.84              | 0.26  | 0.367 |
| $\Sigma$ MUFA                | 38.9              | 38.8               | 40.0              | 0.88  | 0.530 |
| C18:2                        | 9.07              | 9.16               | 8.79              | 0.44  | 0.805 |
| C19:2n-6                     | 0.05 <sup>a</sup> | 0.04 <sup>ab</sup> | 0.03 <sup>b</sup> | 0.01  | 0.037 |
| C18:3n-6                     | 0.08 <sup>a</sup> | 0.07 <sup>ab</sup> | 0.07 <sup>b</sup> | 0.004 | 0.057 |
| C18:3n-3                     | 0.40              | 0.40               | 0.41              | 0.02  | 0.802 |
| C20:2n-6                     | 0.08 <sup>a</sup> | 0.07 <sup>ab</sup> | 0.06 <sup>b</sup> | 0.01  | 0.021 |
| C20:3n-9                     | 0.67              | 0.61               | 0.67              | 0.05  | 0.572 |
| C20:3n-6                     | 0.31              | 0.28               | 0.26              | 0.02  | 0.121 |
| C20:3n-3                     | 0.005             | 0.010              | 0.003             | 0.001 | 0.081 |
| C20:4n-6 ARA                 | 3.55              | 3.51               | 3.45              | 0.2   | 0.941 |
| C20:5n-3 EPA                 | 0.33              | 0.33               | 0.33              | 0.03  | 0.977 |
| C22:4n-6                     | 0.28              | 0.25               | 0.23              | 0.02  | 0.142 |
| C22:5n-6                     | 0.05              | 0.06               | 0.06              | 0.01  | 0.132 |

|                                      |                   |                    |                   |      |       |
|--------------------------------------|-------------------|--------------------|-------------------|------|-------|
| C22:5n-3 DPA                         | 0.61              | 0.58               | 0.54              | 0.04 | 0.422 |
| C22:6n-3 DHA                         | 0.24              | 0.25               | 0.22              | 0.02 | 0.715 |
| $\Sigma$ CLA                         | 0.42 <sup>a</sup> | 0.36 <sup>b</sup>  | 0.35 <sup>b</sup> | 0.02 | 0.014 |
| <i>cis</i> 9, <i>trans</i> 11- C18:2 | 0.21 <sup>a</sup> | 0.16 <sup>ab</sup> | 0.15 <sup>b</sup> | 0.01 | 0.010 |
| $\Sigma$ n-6                         | 13.1              | 13.1               | 12.6              | 0.6  | 0.760 |
| $\Sigma$ n-3                         | 1.59              | 1.57               | 1.51              | 0.09 | 0.800 |
| $\Sigma$ PUFA                        | 16.2              | 16.0               | 15.5              | 0.71 | 0.756 |

<sup>a</sup>Standard error of the mean. <sup>a,b</sup> Least square means in the same row with different superscript letters are different ( $p < 0.05$ );  $\Sigma$ CLA= Sum of Conjugated Linoleic Acids.  $\Sigma$  BCFA= sum of a- and i-fatty acids.  $\Sigma$  DMA= sum of dimethylacetals (DMA-C16:0 + DMA-C18:0 + DMA-C18:1).  $\Sigma$  SFA Me=  $\Sigma$  C14:0Me (C14:0-6Me + C14:0-8Me + C14:0-4Me + C14:0-10Me + C14:0-2,6DiMe) +  $\Sigma$  C15:0Me (C15:0-8Me + C15:0-4Me) +  $\Sigma$  C16:0Me (C16:0-2Me + C16:0-6Me + C16:0-8Me + C16:0-4Me + C16:0-12Me) +  $\Sigma$  C17:0Me (C17:0-12Me + C17:0-cyclo).  $\Sigma$  cis-MUFA= 12:1 + 14:1 + *cis*8-15:1 + *cis*9-15:1 + *cis*7-16:1 + *cis*9-16:1 + *cis*11-16:1 + *cis*15-16:1 + *cis*5-17:1 + *cis*7-17:1 + *cis*9-17:1 + DMA18:1 + *cis*11-17:1 + *cis*6/*cis*8-18:1 + *cis*9-18:1 + *cis*11-18:1 + *cis*12-18:1 + *cis*13-18:1 + *cis*14-18:1 + *cis*15-18:1 + 20:1 + 22:1 + 24:1.  $\Sigma$  trans-MUFA= *trans*5-C18:1 + *trans*6/*trans*8-C18:1 + *trans*9-C18:1 + *trans*10-C18:1 + *trans*11-C18:1 + *trans*12-C18:1
